# Supplementary material for: Longitudinal Study of the Dynamics of Vaginal Microflora during Two Consecutive Menstrual Cycles
Source: PubMed Central journal article supplement (PMC3227645; doi:10.1371/journal.pone.0028180), 2011-11-30
Supplement: pone.0028180.s002.pdf [file pone.0028180.s002.pdf]

## Supporting Information file 2.

| VMF Grade                                                    | Ia         | Iab        | Ib         | I-like     | 0          | II         | III        | IV         | Menses     | Total      |
|--------------------------------------------------------------|------------|------------|------------|------------|------------|------------|------------|------------|------------|------------|
| <b>Number of culturing moments</b>                           | <b>59</b>  | <b>10</b>  | <b>30</b>  | <b>9</b>   | <b>2</b>   | <b>30</b>  | <b>27</b>  | <b>11</b>  | <b>29</b>  | <b>178</b> |
| <b>Number of women from the N and D group (N/D)</b>          | <b>8/2</b> | <b>4/0</b> | <b>3/4</b> | <b>2/2</b> | <b>0/2</b> | <b>4/5</b> | <b>1/6</b> | <b>2/2</b> | <b>8/7</b> | <b>9/8</b> |
| <b>Species</b>                                               |            |            |            |            |            |            |            |            |            |            |
| <b>Lactobacillus spp.</b>                                    |            |            |            |            |            |            |            |            |            |            |
| Lactobacillus coleohominis                                   | 16.9       |            |            |            |            | 3.3        | 3.7        |            |            | 6.7        |
| Lactobacillus crispatus                                      | 76.3       | 90.0       | 13.3       | 11.1       |            | 46.7       | 3.7        | 9.1        | 24.1       | 42.1       |
| Lactobacillus gasseri                                        | 8.5        | 40.0       | 43.3       |            |            | 23.3       |            | 9.1        | 13.8       | 16.9       |
| Lactobacillus iners                                          | 11.9       | 20.0       | 56.7       | 11.1       |            | 23.3       | 29.6       | 9.1        | 17.2       | 24.2       |
| Lactobacillus jensenii                                       | 52.5       | 70.0       | 23.3       | 22.2       |            | 50.0       | 14.8       |            | 34.5       | 37.1       |
| Lactobacillus vaginalis                                      | 13.6       | 30.0       | 23.3       | 11.1       |            | 23.3       | 3.7        |            |            | 15.2       |
| <b>Bifidobacterium spp.</b>                                  |            |            |            |            |            |            |            |            |            |            |
| Bifidobacterium breve                                        | 3.4        |            |            | 11.1       |            |            |            |            |            | 1.7        |
| Bifidobacterium dentium                                      |            |            |            | 22.2       |            |            |            |            |            | 1.1        |
| <b>BV-related species (excluding those mentioned in GPC)</b> |            |            |            |            |            |            |            |            |            |            |
| Aerococcus christensenii                                     |            |            |            |            |            | 3.3        | 18.5       |            | 6.9        | 3.4        |
| Gardnerella vaginalis                                        | 10.2       | 10.0       | 16.7       | 11.1       |            | 60.0       | 55.6       | 9.1        | 27.6       | 26.4       |
| Prevotella amnii                                             |            |            |            |            |            |            | 14.8       |            | 6.9        | 2.2        |
| Prevotella bivia                                             |            |            |            | 22.2       |            | 6.7        | 18.5       |            | 3.4        | 5.1        |
| Prevotella disiens                                           | 1.7        |            | 16.7       |            |            | 3.3        |            |            | 3.4        | 3.9        |
| Prevotella melaninogenica                                    |            |            |            | 11.1       |            |            |            |            |            | 0.6        |
| Prevotella timonensis                                        |            |            | 10.0       |            |            | 6.7        |            |            | 6.9        | 2.8        |
| <b>Gram Positive cocci</b>                                   |            |            |            |            |            |            |            |            |            |            |
| Anaerococcus murdochii                                       |            | 10.0       |            |            |            |            |            |            |            | 0.6        |
| Anaerococcus tetradius                                       | 1.7        |            |            |            |            |            | 33.3       | 9.1        | 6.9        | 6.2        |
| Anaerococcus vaginalis                                       | 3.4        |            | 6.7        | 11.1       |            | 13.3       | 3.7        |            | 10.3       | 5.6        |
| Enterococcus faecalis                                        | 8.5        | 10.0       | 6.7        | 55.6       | 50.0       | 3.3        | 3.7        | 63.6       | 17.2       | 12.9       |
| Fingoldia magna                                              | 6.8        | 10.0       | 23.3       | 33.3       | 100.0      | 13.3       | 14.8       | 27.3       | 27.6       | 15.7       |
| Peptoniphilus harei                                          |            | 20.0       |            |            |            |            |            |            |            | 1.1        |
| Peptoniphilus lacrimalis                                     | 1.7        | 10.0       | 10.0       |            |            | 3.3        | 3.7        |            | 6.9        | 3.9        |
| Peptoniphilus sp.                                            |            | 10.0       |            |            |            |            |            | 9.1        | 3.4        | 1.1        |
| Peptostreptococcus anaerobius                                | 8.5        | 20.0       | 23.3       | 11.1       |            | 36.7       | 44.4       | 18.2       | 41.4       | 22.5       |
| Peptostreptococcus asaccharolyticus                          | 30.5       | 60.0       | 56.7       | 33.3       |            | 60.0       | 37.0       | 45.5       | 41.4       | 43.3       |
| Staphylococcus aureus                                        |            |            | 6.7        | 11.1       |            | 10.0       | 11.1       | 9.1        | 10.3       | 5.6        |
| Staphylococcus epidermidis                                   | 22.0       | 40.0       | 23.3       |            | 50.0       | 16.7       | 22.2       |            | 24.1       | 20.2       |
| Staphylococcus haemolyticus                                  | 1.7        | 10.0       | 6.7        |            |            |            | 3.7        | 9.1        | 3.4        | 3.4        |
| Streptococcus agalactiae                                     | 3.4        | 40.0       | 3.3        | 11.1       |            | 20.0       |            | 18.2       | 20.7       | 9.0        |
| Streptococcus anginosus Group                                | 32.2       | 30.0       | 30.0       | 33.3       |            | 46.7       | 59.3       | 72.7       | 55.2       | 40.4       |
| Streptococcus cristatus                                      |            |            |            | 11.1       |            |            |            |            |            | 0.6        |
| Streptococcus mitis                                          |            |            |            | 11.1       |            |            | 3.7        |            | 3.4        | 1.1        |

| <b>VMF Grade</b>                                    | <b>Ia</b>  | <b>Iab</b> | <b>Ib</b>  | <b>I-like</b> | <b>0</b>   | <b>II</b>  | <b>III</b> | <b>IV</b>  | <b>Menses</b> | <b>Total</b> |
|-----------------------------------------------------|------------|------------|------------|---------------|------------|------------|------------|------------|---------------|--------------|
| <b>Number of culturing moments</b>                  | <b>59</b>  | <b>10</b>  | <b>30</b>  | <b>9</b>      | <b>2</b>   | <b>30</b>  | <b>27</b>  | <b>11</b>  | <b>29</b>     | <b>178</b>   |
| <b>Number of women from the N and D group (N/D)</b> | <b>8/2</b> | <b>4/0</b> | <b>3/4</b> | <b>2/2</b>    | <b>0/2</b> | <b>4/5</b> | <b>1/6</b> | <b>2/2</b> | <b>8/7</b>    | <b>9/8</b>   |
| <b>Species</b>                                      |            |            |            |               |            |            |            |            |               |              |
| Streptococcus sp.                                   |            |            |            | 11.1          |            |            |            |            |               | 0.6          |
| <b>Other Species</b>                                |            |            |            |               |            |            |            |            |               |              |
| Actinomyces urogenitalis                            |            |            | 6.7        |               |            |            | 7.4        | 9.1        | 10.3          | 2.8          |
| Alloscardovia omnicoles                             | 5.1        | 20.0       | 33.3       |               |            | 6.7        | 3.7        | 81.8       | 17.2          | 15.2         |
| Atopobium parvulum                                  |            |            | 3.3        |               | 50.0       |            | 3.7        |            | 3.4           | 1.7          |
| Clostridium saccharobutylicum                       |            | 10.0       |            |               |            |            |            |            |               | 0.6          |
| Corynebacterium coyleae                             |            | 10.0       |            |               |            | 3.3        |            |            |               | 1.1          |
| Corynebacterium glucuronolyticum                    |            | 10.0       |            |               |            |            |            |            |               | 0.6          |
| Escherichia coli                                    | 5.1        |            | 23.3       | 33.3          | 50.0       | 6.7        | 3.7        | 36.4       | 17.2          | 11.8         |
| Fusobacterium nucleatum                             |            | 10.0       |            |               |            | 6.7        | 7.4        |            |               | 2.8          |
| Klebsiella pneumoniae                               | 1.7        |            | 3.3        | 11.1          |            |            | 3.7        | 18.2       |               | 3.4          |
| Propionibacterium avidum                            | 6.8        | 20.0       |            | 11.1          |            | 3.3        |            |            |               | 4.5          |
| Veillonella montpellierensis                        |            | 10.0       |            |               |            | 6.7        |            |            | 3.4           | 1.7          |
| Veillonella parvula                                 | 3.4        |            | 6.7        | 22.2          |            | 3.3        |            | 18.2       | 6.9           | 5.1          |
